# Supplementary material
Source: MDPI journal article supplement (https://www.mdpi.com/2073-4344/14/1/3)

# Highly Efficient and Magnetically Recyclable Non-noble Metal Fly Ash-based Catalysts for 4-Nitrophenol Reduction

Iwona Kuźniarska-Biernacka <sup>1,\*</sup>, Inês Ferreira <sup>1</sup>, Marta Monteiro <sup>1</sup>, Ana Cláudia Santos <sup>2</sup>, Bruno Valentim <sup>2</sup>, Alexandra Guedes <sup>2</sup>, João H. Belo <sup>3</sup>, João P. Araújo <sup>3</sup>, Cristina Freire <sup>1</sup> and Andreia F. Peixoto <sup>1,\*</sup>

<sup>1</sup> LAQV/REQUIMTE, Department of Chemistry and Biochemistry, Faculty of Science, University of Porto, Rua do Campo Alegre s/n, 4169-007 Porto, Portugal; up201704279@fc.up.pt (I.F.); acfreire@fc.up.pt (C.F.)

<sup>2</sup> Earth Science Institute—Porto Pole, Department of Geosciences, Environment and Spatial Plannings, Faculty of Sciences, University of Porto, Rua do Campo Alegre s/n, 4169-007 Porto, Portugal; anasantos@fc.up.pt (A.C.S.); bvvalent@fc.up.pt (B.V.); aguedes@fc.up.pt (A.G.)

<sup>3</sup> IFIMUP, Departamento de Física e Astronomia da Faculdade de Ciências da Universidade do Porto, Rua do Campo Alegre s/n, Porto 4169-007, Portugal; jbelo@fc.up.pt (J.H.B.); jearaujo@fc.up.pt (J.P.A.)

\* Correspondence: iwonakb@fc.up.pt (I.K.-B.); andreia.peixoto@fc.up.pt (A.F.P.)

**Table S1.** Comparison of catalytic conditions and apparent first order rate constants for reduction of 4-NPh by FA<sub>mag</sub>@CS@CuFe and similar catalytic systems recently reported.

| Catalyst                                                    | mass <sup>a</sup><br>(mg) | V <sup>b</sup><br>(mL) | C4NPh <sup>c</sup><br>(mg/mL) | NaBH <sub>4</sub> <sup>d</sup><br>(mg) | K1<br>(min <sup>-1</sup> ) | ref       |
|-------------------------------------------------------------|---------------------------|------------------------|-------------------------------|----------------------------------------|----------------------------|-----------|
| FA-Pd-Ag <sup>f</sup>                                       | 0.2                       | 1.0                    | 1.4×10 <sup>-3</sup>          | 37.0                                   | 0.7176                     | [54]      |
| FA-Pd <sup>f</sup>                                          | 0.2                       | 1.0                    | 1.4×10 <sup>-3</sup>          | 37.0                                   | 0.5449                     | [54]      |
| FA-Ag <sup>f</sup>                                          | 0.2                       | 1.0                    | 1.4×10 <sup>-3</sup>          | 37.0                                   | 0.5572                     | [54]      |
| Au-PPy/FA <sup>g</sup>                                      | 1.0                       | 8.6                    | 9.7×10 <sup>-2</sup>          | 68.0                                   | 0.473                      | [55]      |
| CuFe <sub>2</sub> O <sub>4</sub> /Ag@COF <sup>h</sup>       | 2.0                       | 3.0                    | 4.6×10 <sup>-2</sup>          | 3.4                                    | 0.77                       | [56]      |
| CuFe <sub>2</sub> O <sub>4</sub> /Ag <sup>h</sup>           | 2.0                       | 3.0                    | 4.6×10 <sup>-2</sup>          | 3.4                                    | 0.25                       | [56]      |
| CuFe <sub>2</sub> O <sub>4</sub> @COF <sup>h</sup>          | 2.0                       | 3.0                    | 4.6×10 <sup>-2</sup>          | 3.4                                    | 0.15                       | [56]      |
| ESM/CuFe <sub>2</sub> O <sub>4</sub> <sup>i</sup>           | 10.0                      | 40.0                   | 2.0×10 <sup>-2</sup>          | 0.05                                   | 0.748                      | [57]      |
| CuFe <sub>2</sub> O <sub>4</sub> /CNC@Ag@ZIF-8 <sup>j</sup> | 3.0                       | 3.0                    | 4.6×10 <sup>-2</sup>          | 3.4                                    | 0.64                       | [58]      |
| CuFe <sub>2</sub> O <sub>4</sub> /CNC@Ag <sup>j</sup>       | 3.0                       | 3.0                    | 4.6×10 <sup>-2</sup>          | 3.4                                    | 0.25                       | [58]      |
| CuFe <sub>2</sub> O <sub>4</sub> /CNC <sup>j</sup>          | 3.0                       | 3.0                    | 4.6×10 <sup>-2</sup>          | 3.4                                    | 0.08                       | [58]      |
| 98CuFe <sub>2</sub> O <sub>4</sub> -2RGO <sup>k</sup>       | 0.2                       | 8.0                    | 7.04×10 <sup>-1</sup>         | 7.56                                   | 0.48                       | [59]      |
| 96CuFe <sub>2</sub> O <sub>4</sub> -4RGO <sup>k</sup>       | 0.2                       | 8.0                    | 7.04×10 <sup>-1</sup>         | 7.56                                   | 1.032                      | [59]      |
| 94CuFe <sub>2</sub> O <sub>4</sub> -6RGO <sup>k</sup>       | 0.2                       | 8.0                    | 7.04×10 <sup>-1</sup>         | 7.56                                   | 0.618                      | [59]      |
| 92CuFe <sub>2</sub> O <sub>4</sub> -8RGO <sup>k</sup>       | 0.2                       | 8.0                    | 7.04×10 <sup>-1</sup>         | 7.56                                   | 0.588                      | [59]      |
| C-dot@CuFe <sub>2</sub> O <sub>4</sub> <sup>l</sup>         | 0.05                      | 3.0                    | 1.40×10 <sup>-2</sup>         | 9.45                                   | 4.0258                     | [60]      |
| CuFe <sub>2</sub> O <sub>4</sub> -CDs <sup>m</sup>          | 0.05                      | 3.0                    | 1.70×10 <sup>-2</sup>         | 9.5                                    | 9.12                       | [61]      |
| FA <sub>mag</sub> @CS@CuFe                                  | 100                       | 30                     | 7.7                           | 56.7                                   | 1.9761                     | This work |

<sup>a</sup> catalysts mass; <sup>b</sup> volume total of the reaction mixture; <sup>c</sup> concentration of 4-NPh in the reaction mixture; <sup>d</sup> mass of NaBH<sub>4</sub> in the reaction mixture; <sup>e</sup> apparent first-order kinetic constant of reduction of 4-NPh; <sup>f</sup> FA-Pd-Ag - Coal Fly ash supported Pd-Ag bimetallic nanoparticles, FA-Pd- Coal Fly ash supported Pd nanoparticles, FA-Ag- Coal Fly ash supported Ag nanoparticles; <sup>g</sup> Au-PPy/FA - core-shell composite microspheres with fly ash (FA) and Au nanoparticles embedded in polypyrrole (PPy) chains; <sup>h</sup> CuFe<sub>2</sub>O<sub>4</sub>/Ag@COF - core-shell structure nanocomposite containing magnetic CuFe<sub>2</sub>O<sub>4</sub>/Ag nanoparticles and porous COF (covalent organic frameworks), where 1,3,5-tris(4-aminophenyl)benzene and 2,5-dimethoxyterephthaldehyde, was utilized as the COF shell material; <sup>i</sup> ESM/CuFe<sub>2</sub>O<sub>4</sub> - eggshell membrane-CuFe<sub>2</sub>O<sub>4</sub> nanocomposite, the 4-NPh conversion 98.8% during 5.5 min; <sup>j</sup> CuFe<sub>2</sub>O<sub>4</sub>/CNC@Ag@ZIF-8 - cellulose nanocrystals (CNC) supported magnetic CuFe<sub>2</sub>O<sub>4</sub>@Ag@ZIF-8 nanospheres where ZIF-8 framework is Zn(MeIM)<sub>2</sub> where MeIM is 2-methylimidazole, CuFe<sub>2</sub>O<sub>4</sub>/CNC@Ag nanocomposite consisted of cellulose nanocrystals and CuFe<sub>2</sub>O<sub>4</sub>/Ag nanoparticles, CuFe<sub>2</sub>O<sub>4</sub>/CNC - cellulose nanocrystals supported CuFe<sub>2</sub>O<sub>4</sub> nanoparticles; <sup>k</sup> 98CuFe<sub>2</sub>O<sub>4</sub>-2RGO -reduced graphene oxide (RGO) nanocomposite with 98 wt%CuFe<sub>2</sub> O<sub>4</sub> and 2 wt% RGO, 96CuFe<sub>2</sub>O<sub>4</sub>-4RGO - nanocomposite with 96 wt%CuFe<sub>2</sub> O<sub>4</sub> and 4 wt% RGO, 94CuFe<sub>2</sub>O<sub>4</sub>-6RGO - nanocomposite with 94 wt%CuFe<sub>2</sub> O<sub>4</sub> and 6 wt% RGO, 92CuFe<sub>2</sub>O<sub>4</sub>-8RGO - nanocomposite with 92 wt%CuFe<sub>2</sub> O<sub>4</sub> and 8 wt% RGO; <sup>l</sup> C-dot@CuFe<sub>2</sub>O<sub>4</sub> - core-shell carbon dot@CuFe<sub>2</sub>O<sub>4</sub> hybrid material; <sup>m</sup> CuFe<sub>2</sub>O<sub>4</sub>-CDs- Carbon dots coated CuFe<sub>2</sub>O<sub>4</sub> nanocomposite

Figure S1. Detailed imaging and X-ray microanalysis of the FA<sub>mag</sub>@CS@Cu sample

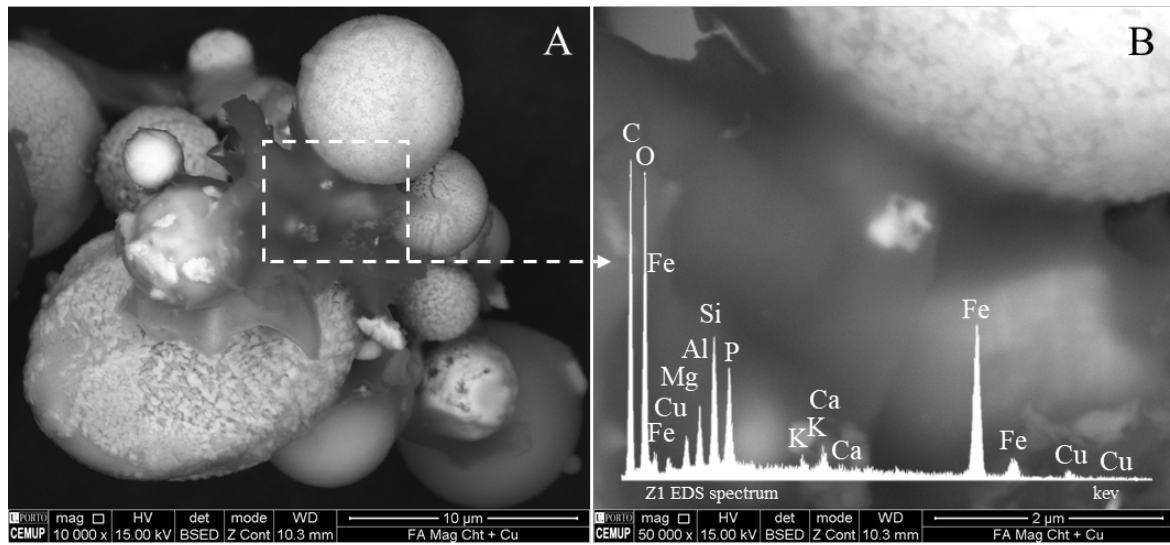

Figure S2. Elemental area-mappings for FA<sub>mag</sub>@CS@Cu sample

FA<sub>mag</sub>@CS@CuFe

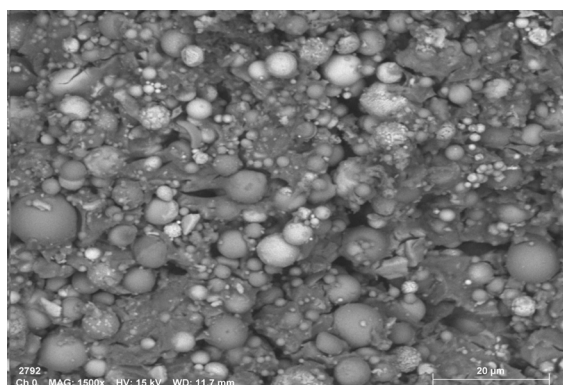

Carbon

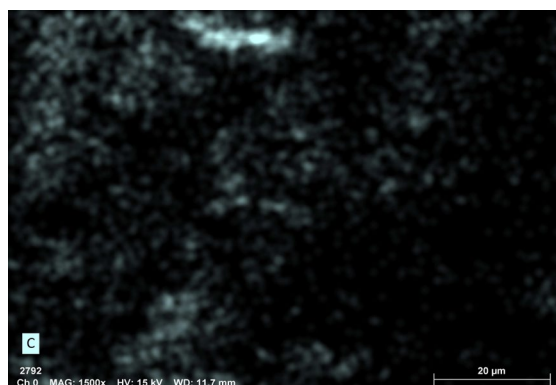

Iron

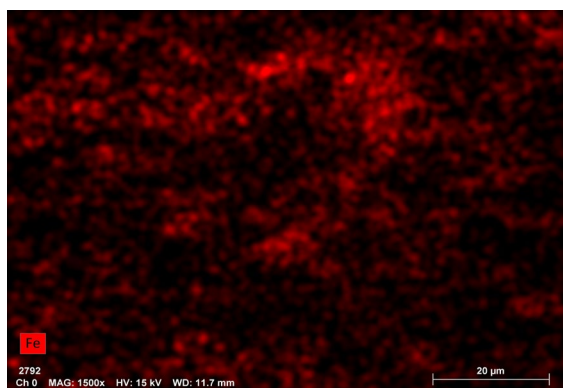

Copper

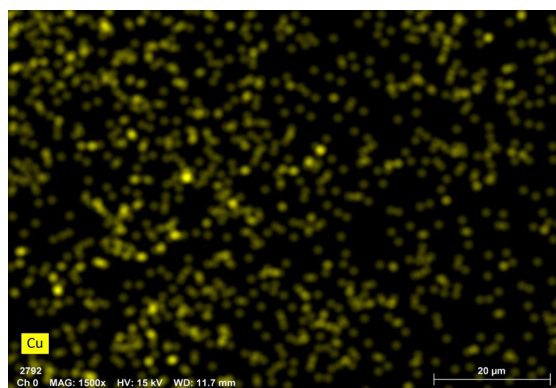

Figure S3. Change of UV-Vis spectrum of 4-NPh during the reduction of 4-NPh by NaBH<sub>4</sub> in the presence of: A - FA<sub>mag</sub>@CS@CuFe, B - CuFe, C - FA<sub>mag</sub>@CS@Cu, D - FA<sub>mag</sub> and E - FA<sub>mag</sub>@CS catalysts (initial 4-NPh concentration  $c = 5.5 \times 10^{-5}$  M, catalyst dosage = 3.3 mg L<sup>-1</sup>, NaBH<sub>4</sub> concentration  $c = 0.05$  M).

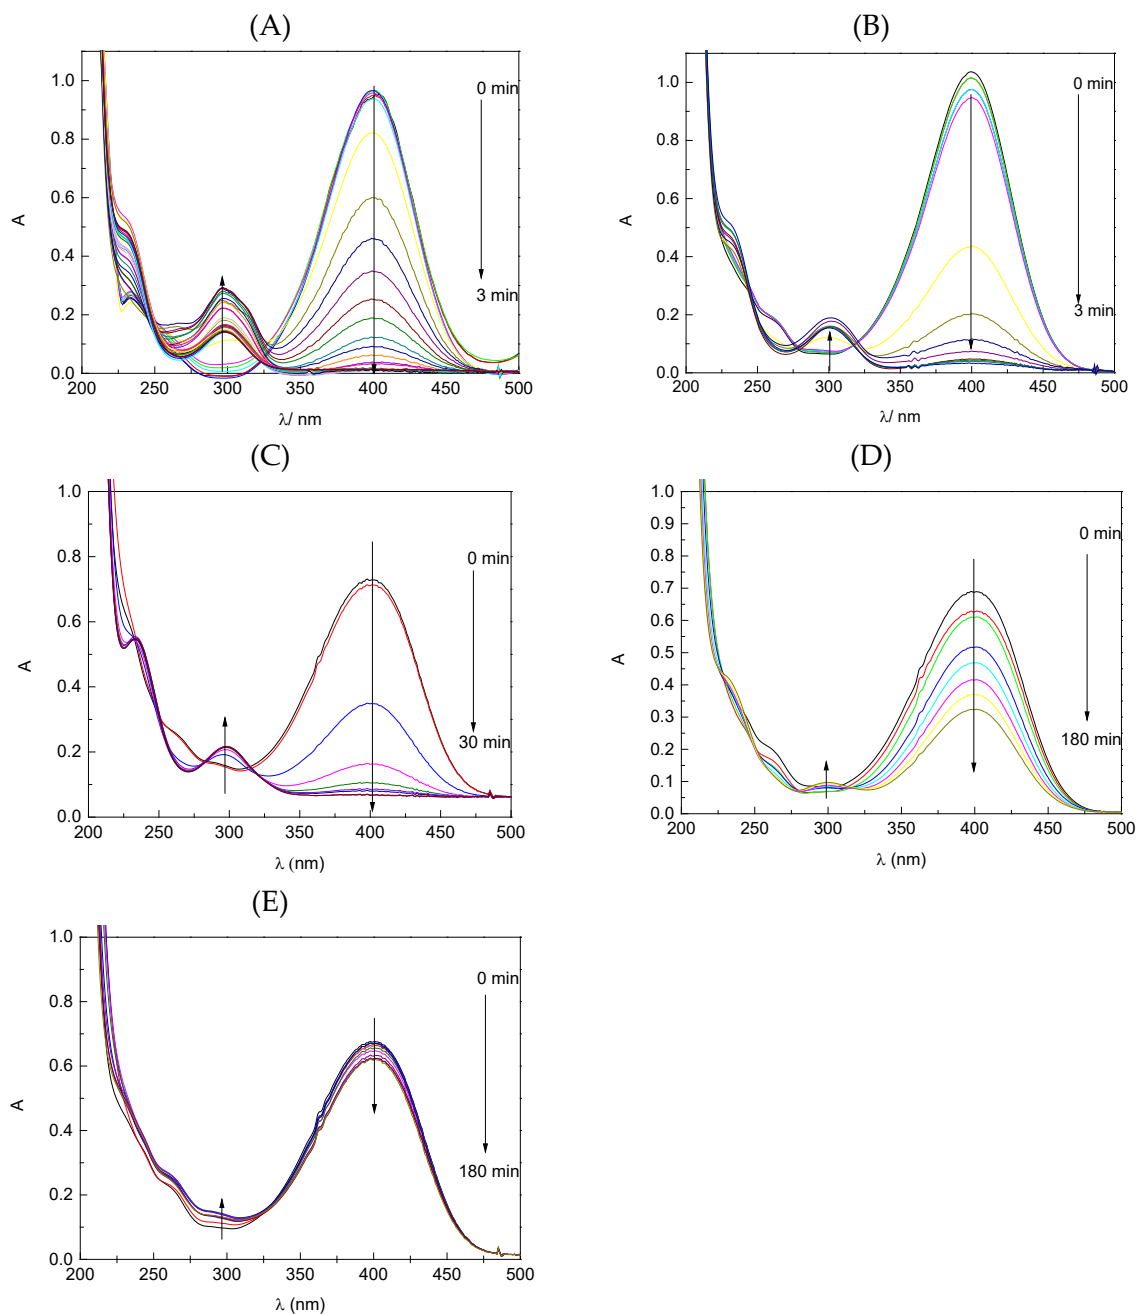

Figure S4. Reproducibility tests of FA<sub>mag</sub> catalyst (initial 4-NPh concentration  $c = 5.5 \times 10^{-5}$  M, catalyst dosage = 3.3 mg L<sup>-1</sup>, NaBH<sub>4</sub> concentration  $c = 0.05$  M).

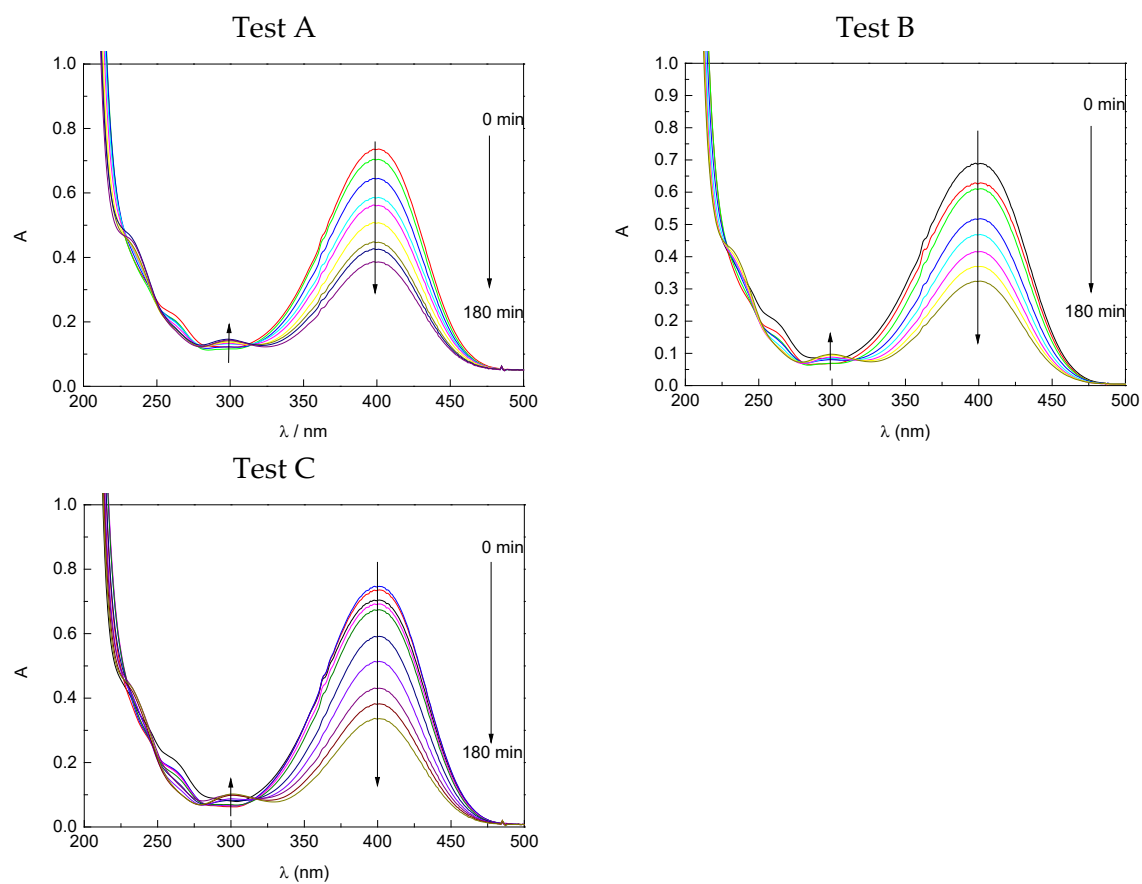

Figure S5. Stability tests of FA<sub>mag</sub>@CS@CuFe catalyst (initial 4-NPh concentration  $c = 5.5 \times 10^{-5}$  M, catalyst dosage = 3.3 mg L<sup>-1</sup>, NaBH<sub>4</sub> concentration  $c = 0.05$  M).

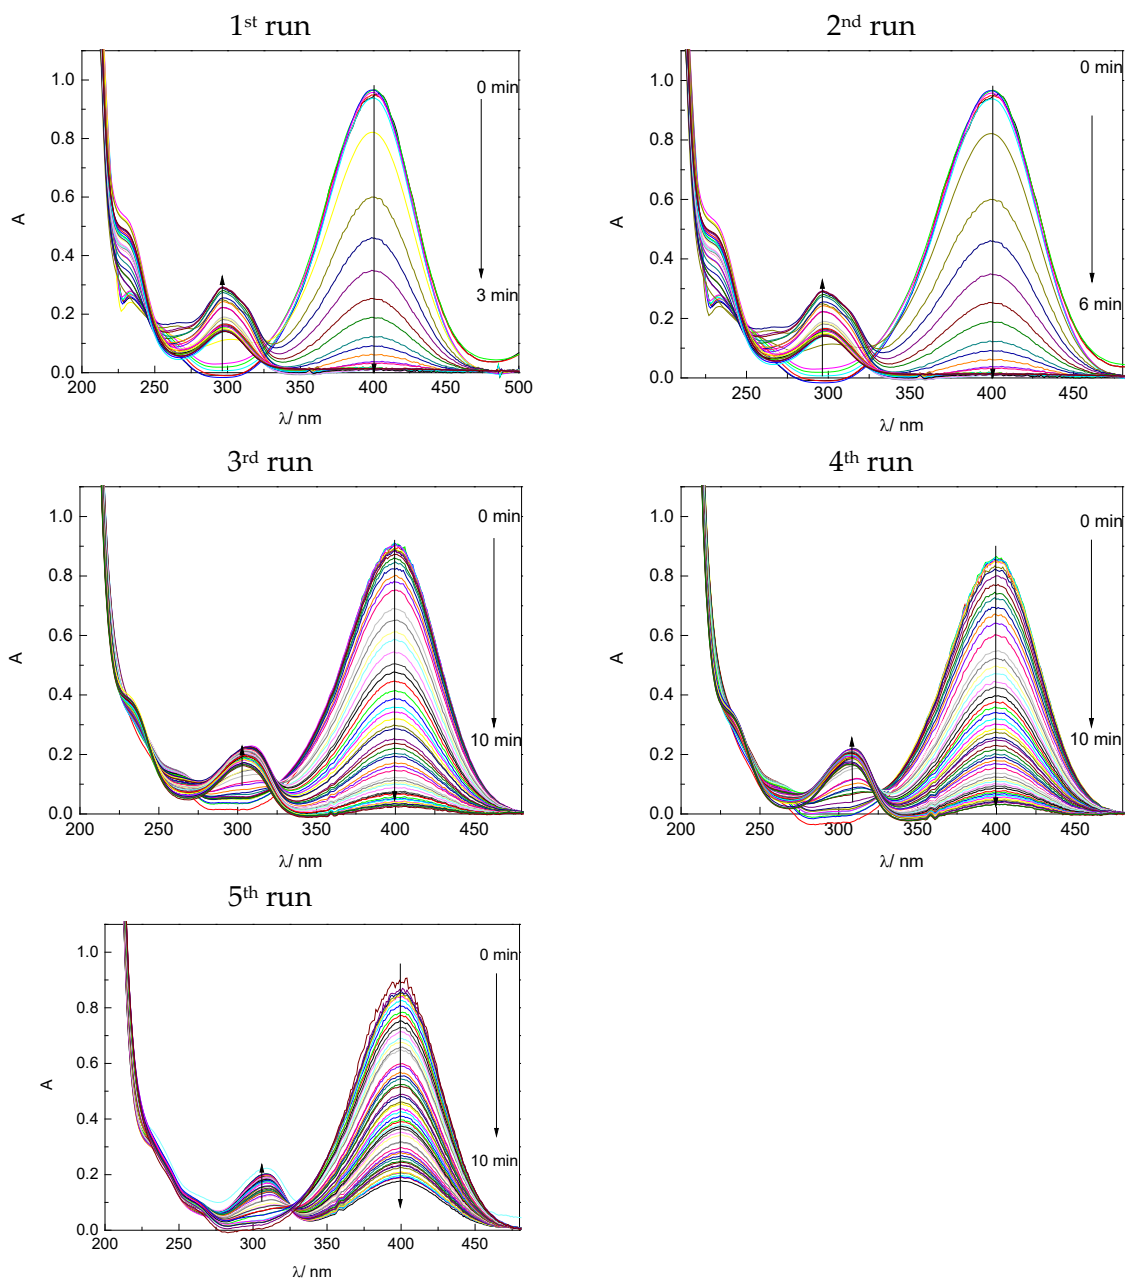

Figure S6. XRD patterns of CuFe nanoparticles, samples FA<sub>mag</sub>, and composite FA<sub>mag</sub>@CS@CuFe, where FA<sub>mag</sub>@CS@CuFe\* is the catalyst after the last catalytic cycle

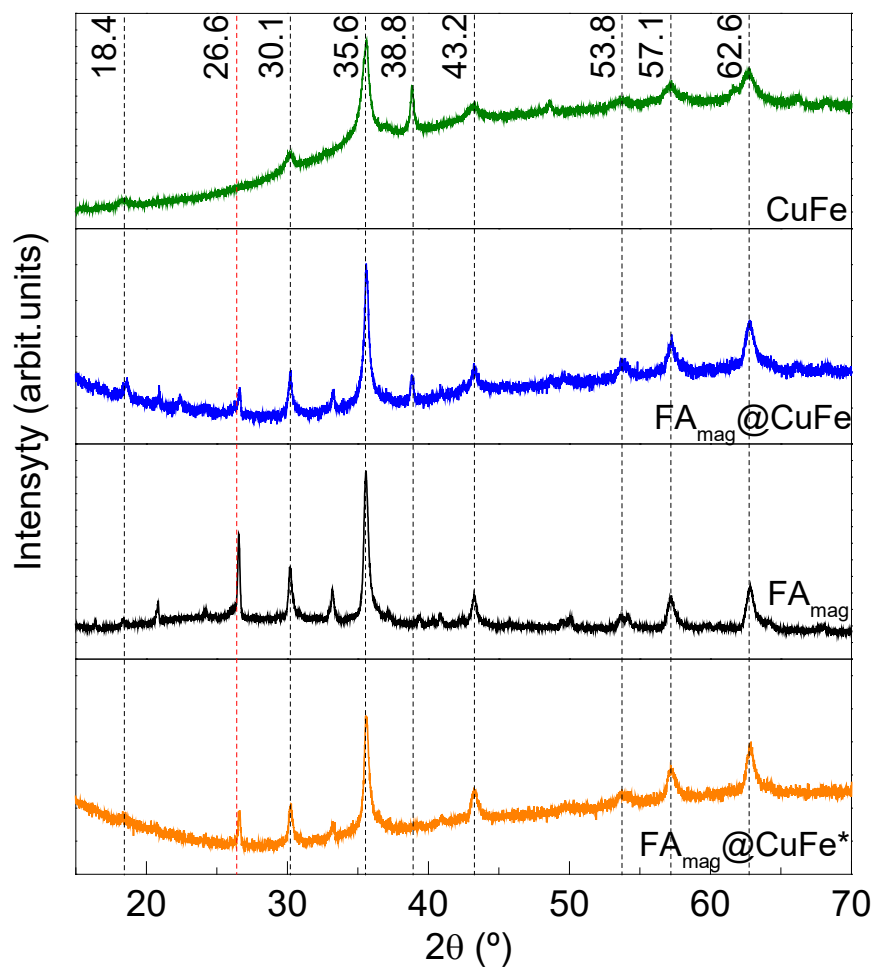

Supplement: s1 [file s1]
